# Supplementary figures and images for: Enhancing protein stability under stress: osmolyte-based deep eutectic solvents as a biocompatible and robust stabilizing medium for lysozyme under heat and cold shock
Source: Royal Society of Chemistry journal article supplement (doi:10.1039/d4cp02275k), 2024-01-01

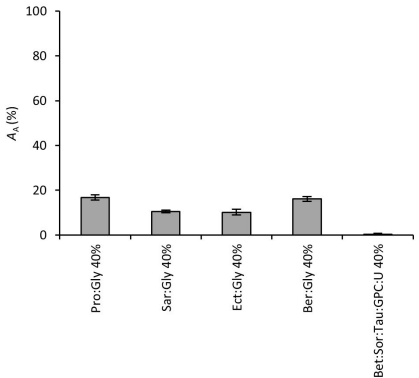

Supplement: d4cp02275k10.pdf [file d4cp02275k10.pdf]

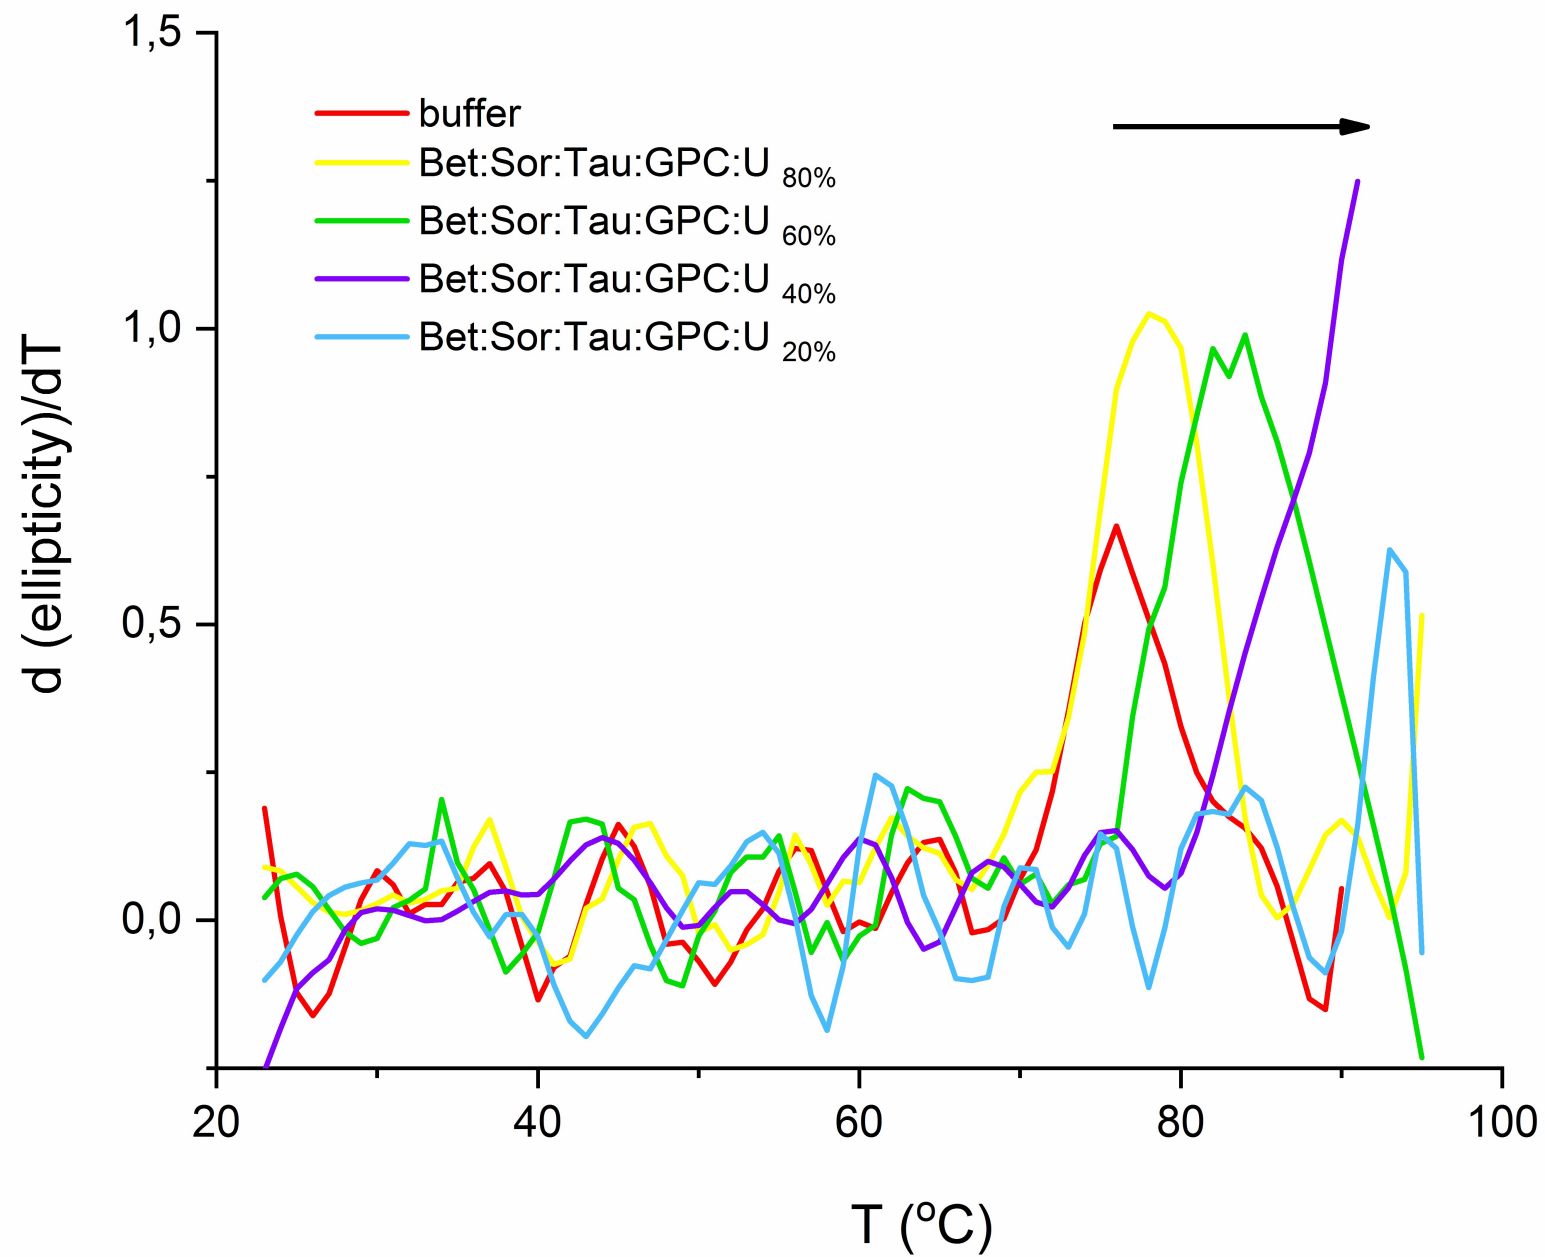

Supplement: d4cp02275k11.pdf [file d4cp02275k11.pdf]

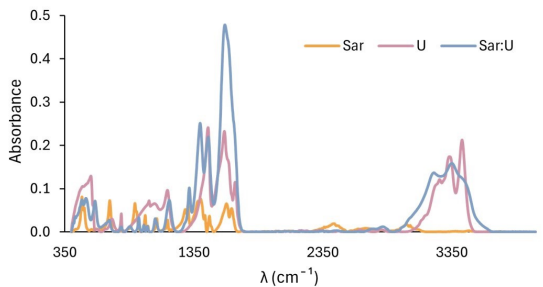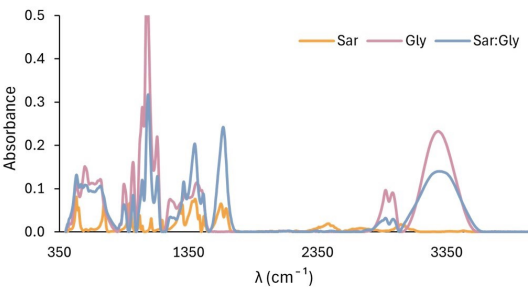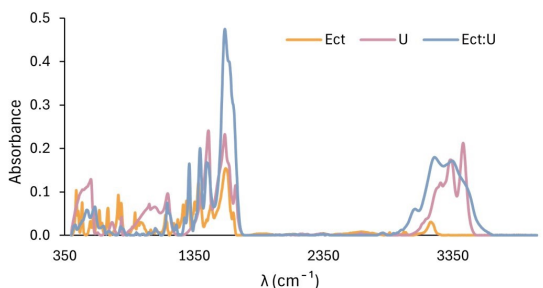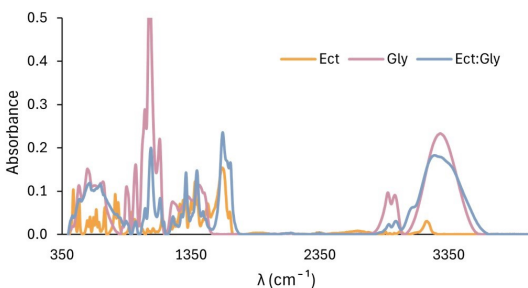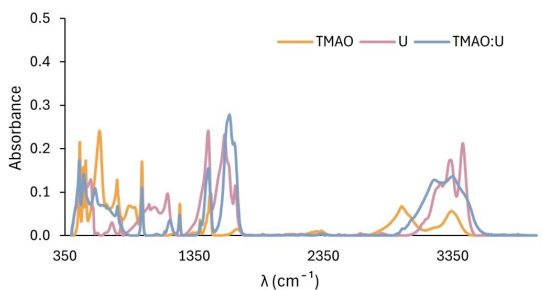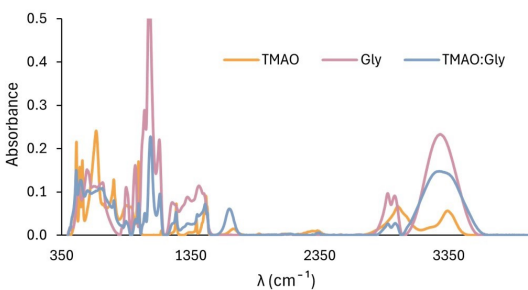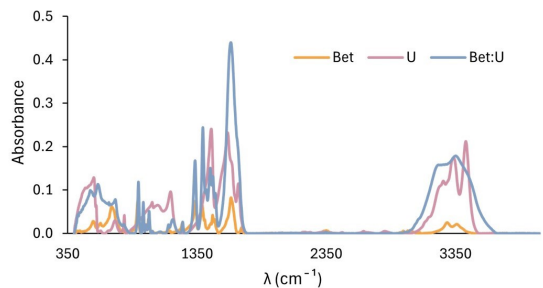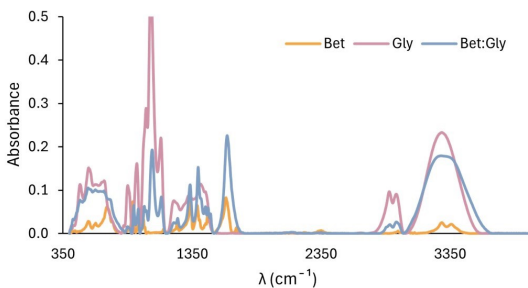

Supplement: d4cp02275k2.pdf [file d4cp02275k2.pdf]

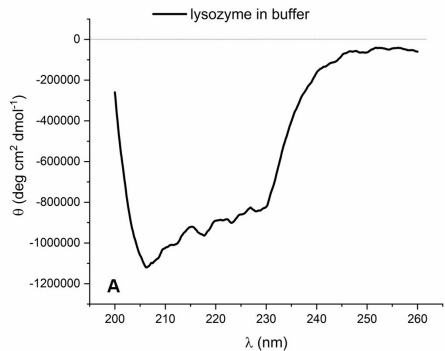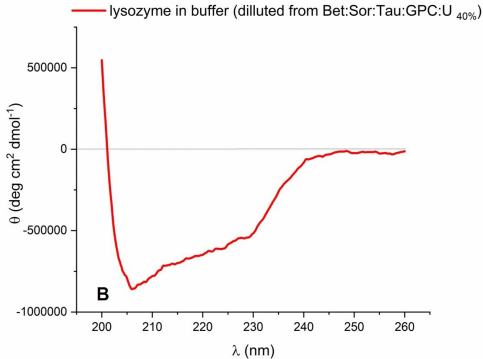

Supplement: d4cp02275k3.pdf [file d4cp02275k3.pdf]

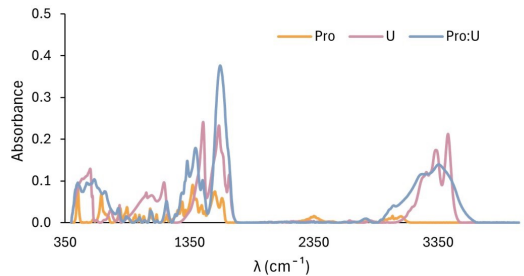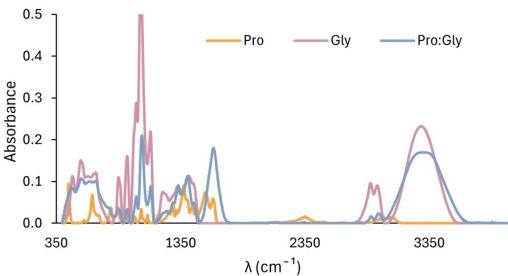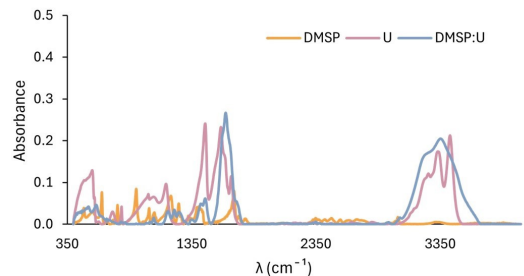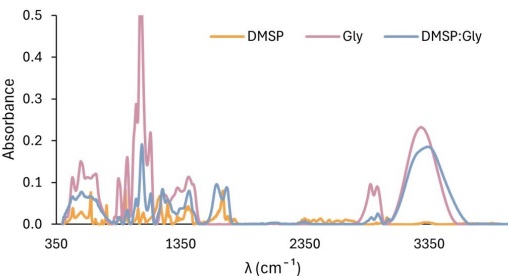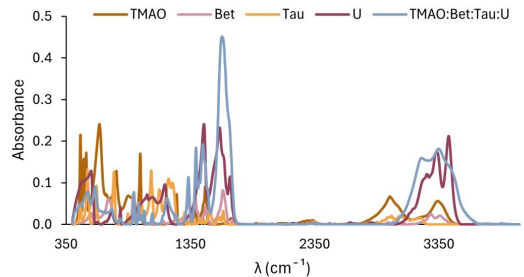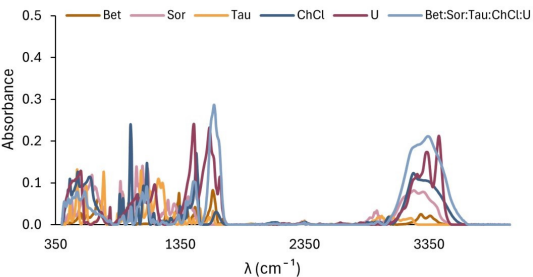

Supplement: d4cp02275k4.pdf [file d4cp02275k4.pdf]

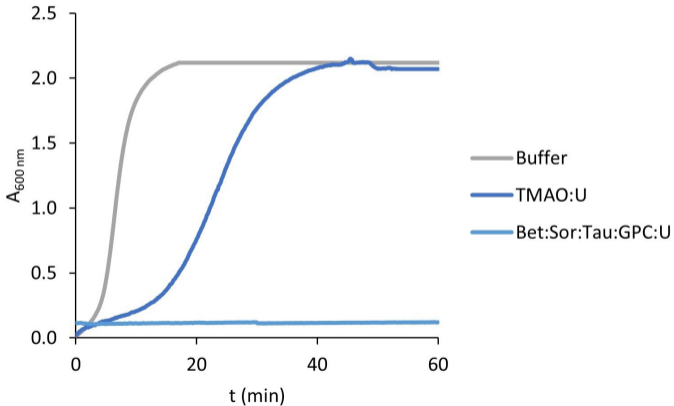

Supplement: d4cp02275k5.pdf [file d4cp02275k5.pdf]

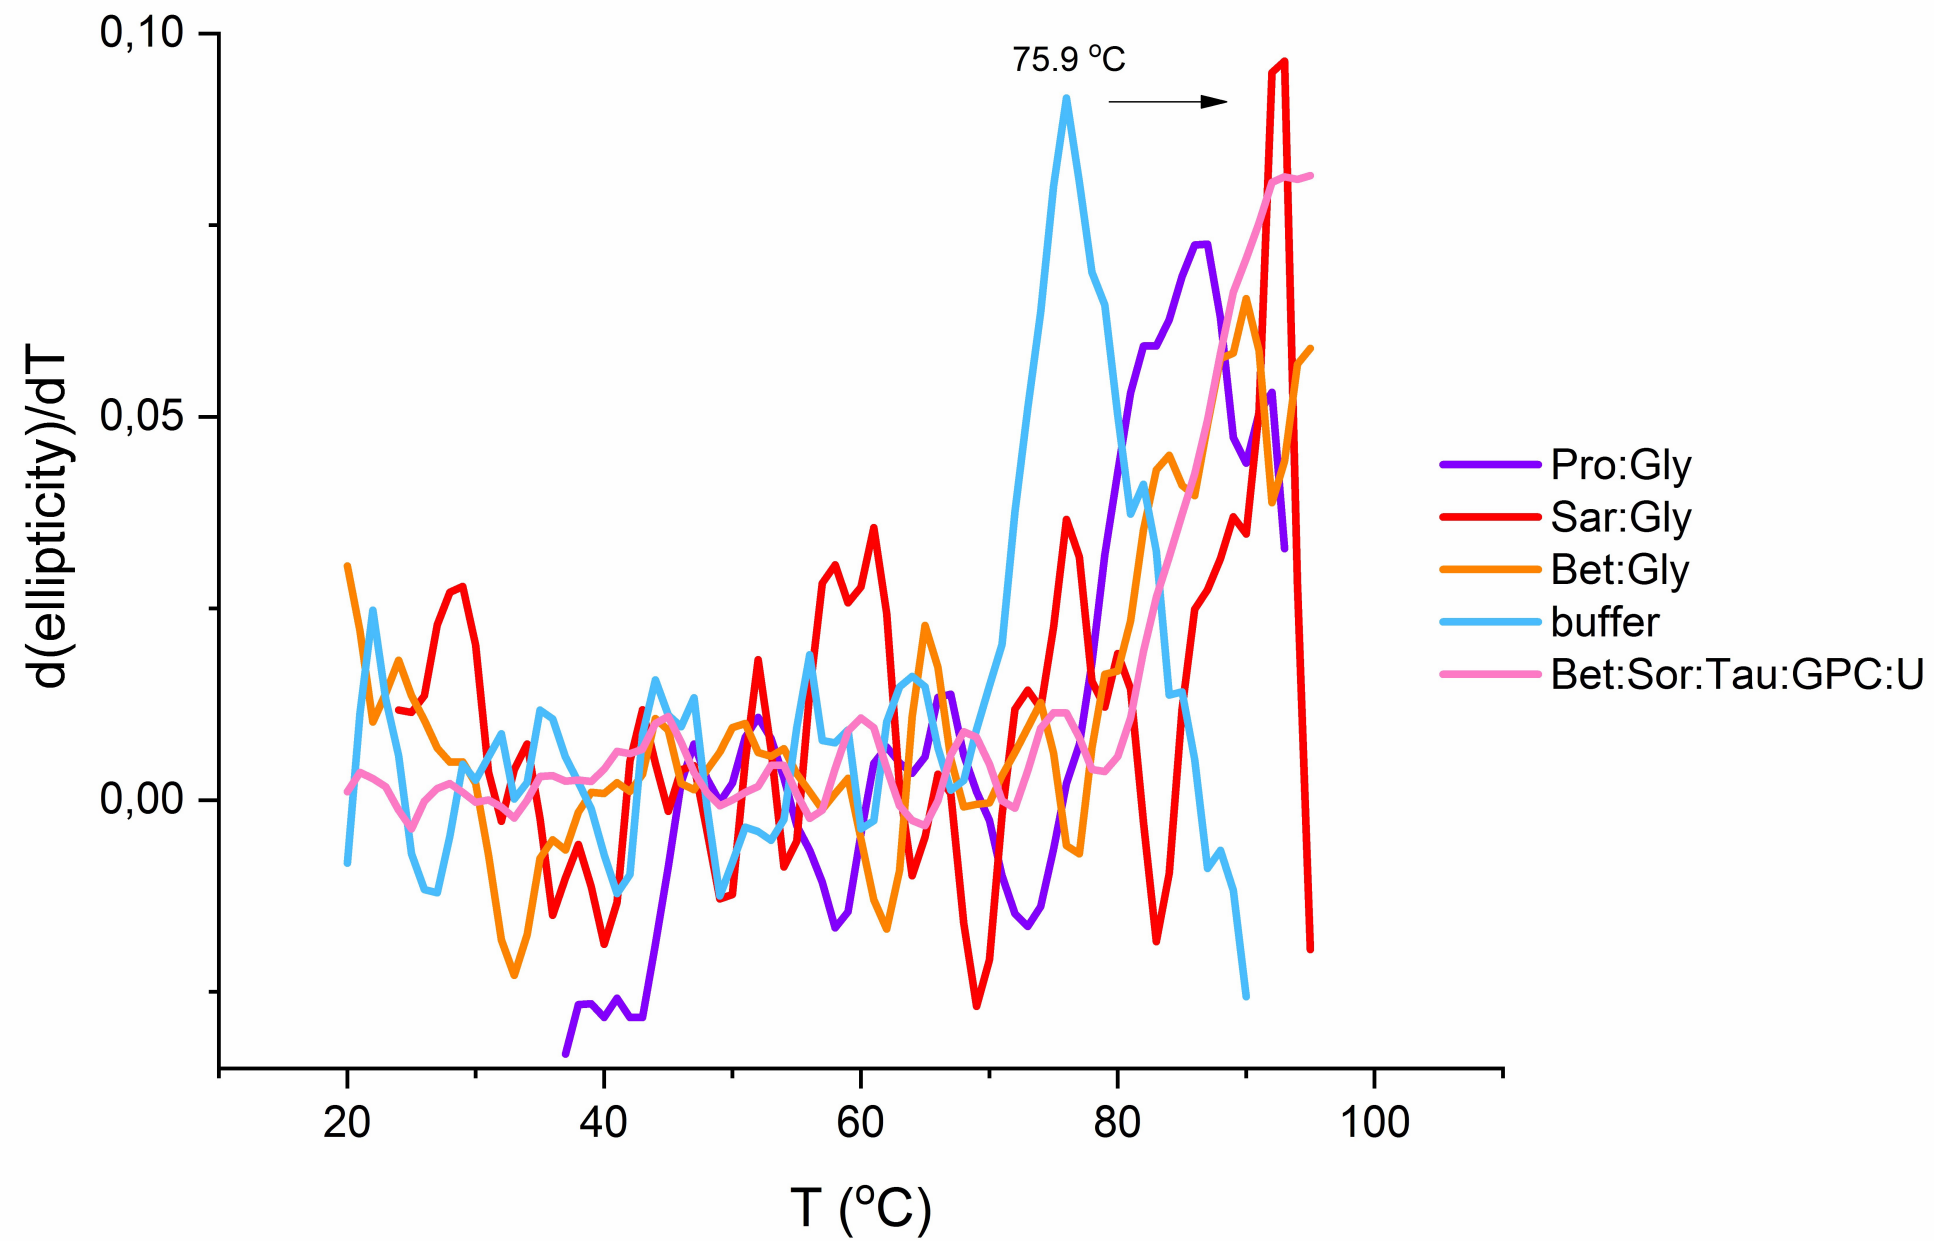

Supplement: d4cp02275k6.pdf [file d4cp02275k6.pdf]

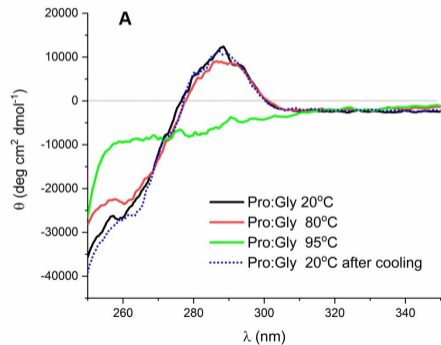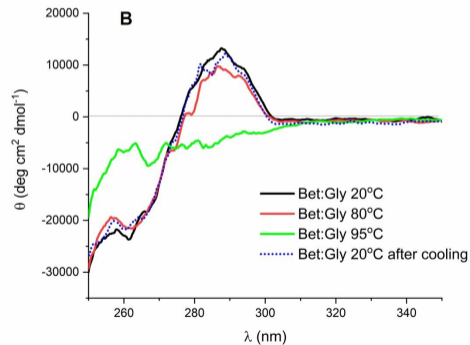

Supplement: d4cp02275k7.pdf [file d4cp02275k7.pdf]

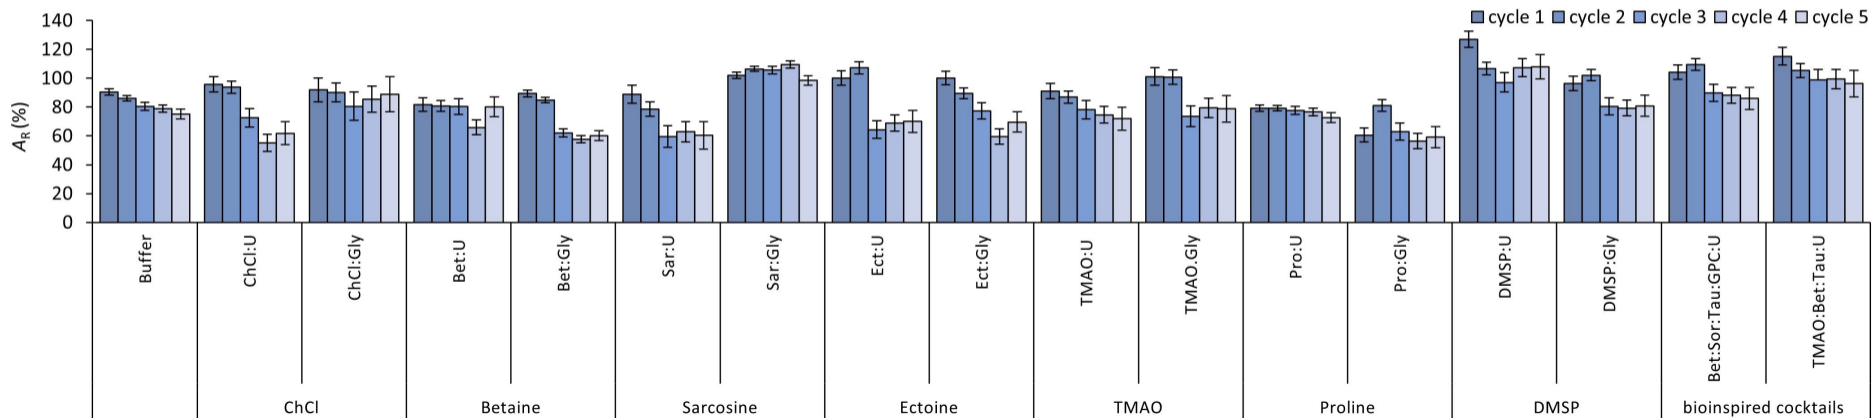

Supplement: d4cp02275k8.pdf [file d4cp02275k8.pdf]

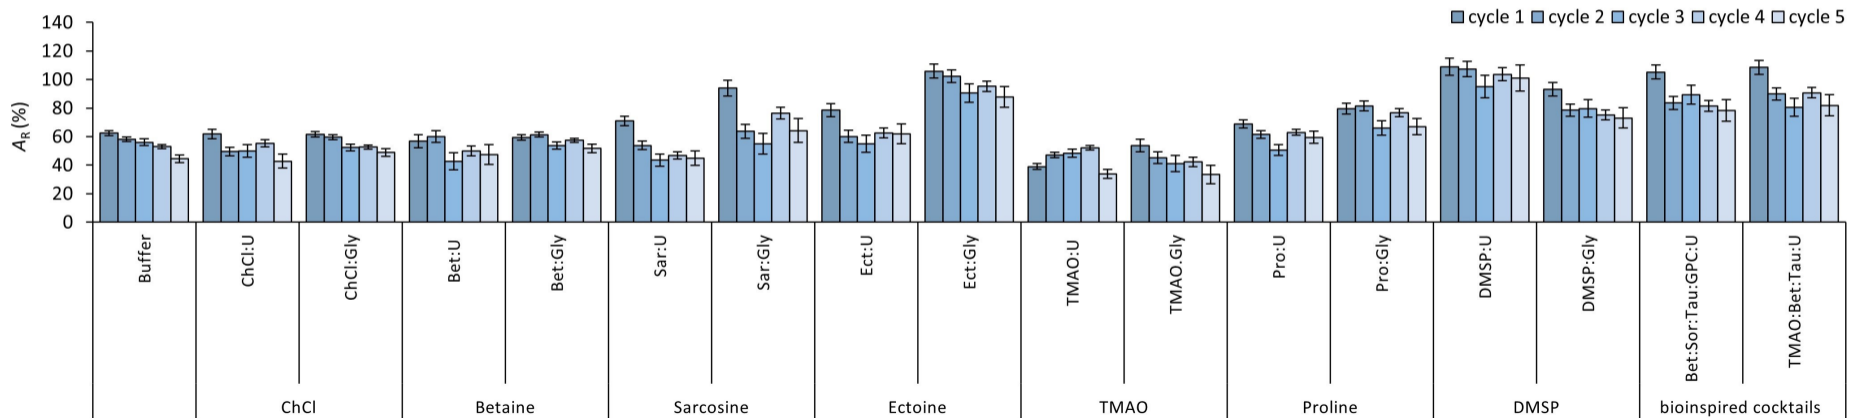

Supplement: d4cp02275k9.pdf [file d4cp02275k9.pdf]
